# Supplementary material
Source: PubMed Central journal article supplement (PMC5474142)
Supplement: NIHMS844969-supplement-supplement_1.pdf [file NIHMS844969-supplement-supplement_1.pdf]

**Supplemental Table 1.** Logistic regression model of risk factors for ICU-onset VAP.

| <b>Risk Factors</b>     | <b>VAP/Total Exposed (%)</b> | <b>Odds Ratio<br/>(95% CI)</b> |
|-------------------------|------------------------------|--------------------------------|
| PPIs                    |                              |                                |
| No                      | 305 / 2,224 (13.7%)          | Ref                            |
| Yes                     | 592 / 4,606 (12.9%)          | 1.16 (0.97-1.39)               |
| H2RAs only              |                              |                                |
| No                      | 764 / 6,195 (12.3%)          | Ref                            |
| Yes                     | 133 / 635 (20.9%)            | 2.13 (1.66-2.73)               |
| Age category            |                              |                                |
| Under 45                | 128 / 1,067 (12.0%)          | Ref                            |
| 45-65                   | 324 / 2,341 (13.8%)          | 1.26 (1.01-1.57)               |
| 65+                     | 445 / 3,422 (13.0%)          | 1.21 (0.98-1.51)               |
| CCI                     |                              |                                |
| 0-2                     | 490 / 3,573 (13.7%)          | Ref                            |
| 3+                      | 407 / 3,257 (12.5%)          | 0.87 (0.75-1.00)               |
| Antibiotics             |                              |                                |
| None                    | 258 / 2,364 (10.9%)          | Ref                            |
| Narrow spectrum         | 181 / 1,645 (11.0%)          | 0.93 (0.76-1.14)               |
| Broad spectrum          | 458 / 2,821 (16.2%)          | 1.44 (1.22-1.71)               |
| Central venous catheter |                              |                                |
| No                      | 137 / 1,389 (9.9%)           | Ref                            |
| Yes                     | 760 / 5,441 (14.0%)          | 1.37 (1.18-1.67)               |

ICU, intensive care unit; VAP, ventilator-associated pneumonia; CI, confidence interval; PPIs, proton pump inhibitors; H2RAs, histamine-2 receptor antagonists; CCI, Charlson Comorbidity Index.

**Supplemental Table 2.** Antibiotic classes included in the study. Study classification as narrow- versus broad-spectrum was based on Brown *et al.*<sup>22</sup>

| <b>Antibiotic class</b>                    | <b>Example</b>                | <b>Study Classification</b> |
|--------------------------------------------|-------------------------------|-----------------------------|
| Aminoglycosides                            | Gentamicin                    | Narrow-spectrum             |
| Penicillins/ $\beta$ -lactamase inhibitors | Piperacillin-tazobactam       | Broad-spectrum              |
| Carbapenems                                | Meropenem                     | Broad-spectrum              |
| Cephalosporins                             | Cephalexin                    | Broad-spectrum              |
| Fluoroquinolones                           | Levofloxacin                  | Broad-spectrum              |
| Glycylcyclines                             | Tigecycline                   | Broad-spectrum              |
| Glycopeptides                              | Vancomycin                    | Narrow-spectrum             |
| Lincosamides                               | Clindamycin                   | Broad-spectrum              |
| Lipopeptides                               | Daptomycin                    | Narrow-spectrum             |
| Macrolides                                 | Clarithromycin                | Narrow-spectrum             |
| Monobactams                                | Aztreonam                     | Narrow-spectrum             |
| Nitroimidazoles                            | Metronidazole                 | Broad-spectrum              |
| Oxazolidinone                              | Linezolid                     | Narrow-spectrum             |
| Penicillins                                | Amoxicillin                   | Narrow-spectrum             |
| Sulfa-based                                | Trimethoprim-sulfamethoxazole | Broad-spectrum              |
| Tetracyclines                              | Doxycycline                   | Narrow-spectrum             |
